# Supplementary material for: Building blocks for protein interaction devices
Source: PubMed Central journal article supplement — Nucleic Acids Res. 2010 Mar 9;38(8):2645–62. doi: 10.1093/nar/gkq152 (PMC2860130; doi:10.1093/nar/gkq152), 2010-03-09
Supplement: gkq152_1.pdf [file gkq152_1.pdf]

# Supplemental Material

Raik Grünberg, Tony S. Ferrar, Almer M. Van der Sloot,  
Marco Constante, Luis Serrano

February 20, 2010

## Supplemental Figures

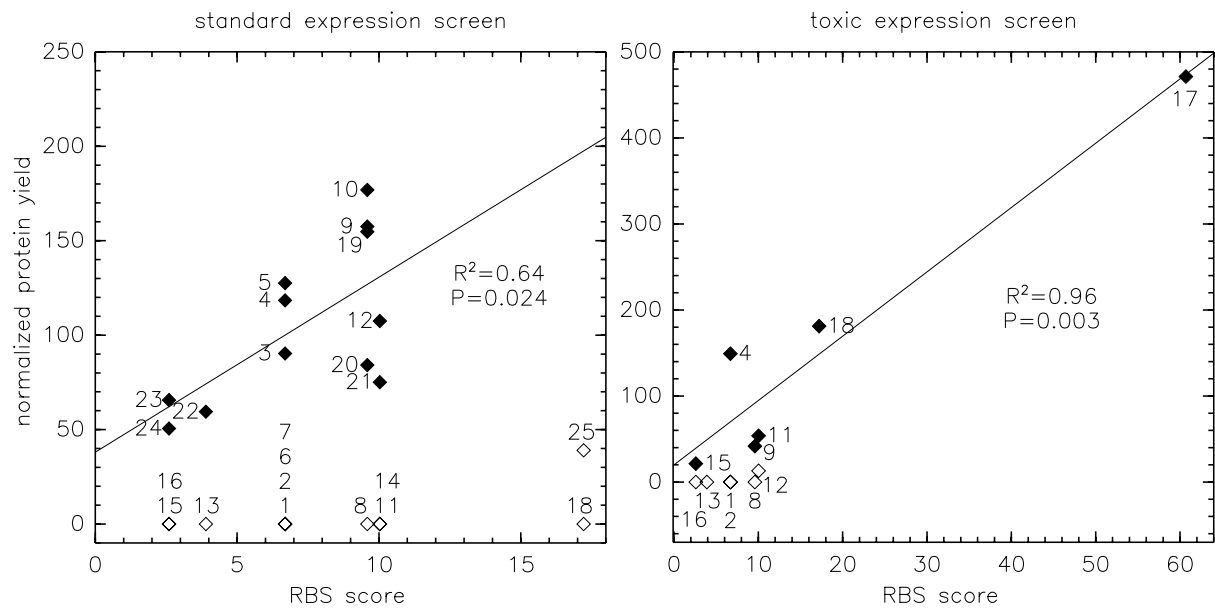

**Figure S1:** Control of protein expression by RBS obstruction. Total yields were normalized to cell density and are compared to the RBS calculator score reporting on the formation of mRNA secondary structure. Only filled data points above a low threshold were considered for the linear regression. The RBS score (here divided by 1000) considers only a sequence window surrounding the translation initiation site and is thus identical for constructs that share the same leading domain. Protein IDs are given next (above, below) to each data point (stacked if several constructs with zero expression share the same RBS score). Protein 17 showed no expression during the standard screen and is omitted from the left figure.

## Supplemental Tables

Table S1: Yields of final assembly reactions.

| ID                      | part A <sup>a</sup>     | part B <sup>b</sup> | c.f.u. <sup>c</sup> | % correct <sup>d</sup> | failures <sup>e</sup> / comments |
|-------------------------|-------------------------|---------------------|---------------------|------------------------|----------------------------------|
| P01                     | T7>-FKBP~ gLuc-frag 1   | + ∞H <sub>6</sub> < | 200                 | 100                    |                                  |
| P02                     | T7>-FKBP~ gLuc-frag 2   | + ∞H <sub>6</sub> < | 200                 | 25                     |                                  |
| P03                     | T7>-FKBP~ mCitrine      | + ∞H <sub>6</sub> < | 200                 | 75                     |                                  |
| P04                     | T7>-FKBP~ mCherry       | + ∞H <sub>6</sub> < | 18                  | 25                     |                                  |
| P05                     | T7>-FKBP~ mCerulean     | + ∞H <sub>6</sub> < | 30                  | 75                     |                                  |
| P06                     | T7>-FKBP~ bla-frag 1    | + ∞H <sub>6</sub> < | 70                  | 75                     |                                  |
| P07                     | T7>-FKBP~ bla-frag 2    | + ∞H <sub>6</sub> < | 50                  | 50                     |                                  |
| P08                     | T7>-FRB~ gLuc-frag 1    | + ∞H <sub>6</sub> < | 70                  | 50                     |                                  |
| P09                     | T7>-FRB~ gLuc-frag 2    | + ∞H <sub>6</sub> < | 70                  | 75                     |                                  |
| P10                     | T7>-FRB~ mCherry        | + ∞H <sub>6</sub> < | 100                 | 100                    |                                  |
| P11                     | T7>-ZipE34~ gLuc-frag 1 | + ∞H <sub>6</sub> < | 200                 | 50                     |                                  |
| P12                     | T7>-ZipE34~ mCerulean   | + ∞H <sub>6</sub> < | 6                   | 100                    |                                  |
| P13                     | T7>-ZipR34~ gLuc-frag 2 | + ∞H <sub>6</sub> < | 2                   | 100                    |                                  |
| P14                     | T7>-ZipE34~ bla-frag 1  | + ∞H <sub>6</sub> < | 15                  | 50                     |                                  |
| P15                     | T7>-LOV2~ gLuc-frag 1   | + ∞H <sub>6</sub> < | 80                  | 75                     |                                  |
| P16                     | T7>-LOV2~ gLuc-frag 2   | + ∞H <sub>6</sub> < | 70                  | 75                     |                                  |
| P17                     | T7>-gLuc-frag 1~ LOV2   | + ∞H <sub>6</sub> < | 10                  | 50                     |                                  |
| P18                     | T7>-mCitrine~ LOV2      | + ∞H <sub>6</sub> < | 200(50)             | 100(75)                |                                  |
| P19                     | T7>-FRB~ mCitrine       | + ∞H <sub>6</sub> < | 6                   | 50                     |                                  |
| P20                     | T7>-FRB~ mCerulean      | + ∞H <sub>6</sub> < | 160                 | 75                     |                                  |
| P21                     | T7>-ZipE34~ mCherry     | + ∞H <sub>6</sub> < | 40(140)             | 50(25)                 | 1                                |
| P22                     | T7>-ZipR34~ mCitrine    | + ∞H <sub>6</sub> < | 160                 | 75                     | 1                                |
| P23                     | T7>-LOV2~ mCitrine      | + ∞H <sub>6</sub> < | 11                  | 100                    | 2                                |
| P24                     | T7>-LOV2~ mCerulean     | + ∞H <sub>6</sub> < | 7                   | 100                    | 1                                |
| P25                     | T7>-mCerulean~ LOV2     | + ∞H <sub>6</sub> < | 190                 | 100                    |                                  |
| <b>other constructs</b> |                         |                     |                     |                        |                                  |
|                         | T7>-FKBP                | + ∞H <sub>6</sub> < | 150                 | 75                     | ok but not used                  |
|                         | T7>-gLuc-frag1~ LOV2    | + ∞H <sub>6</sub> < | 50                  | 0                      | 2                                |
|                         | T7>-FRB~ bla-frag1      | + ∞H <sub>6</sub> < | 400                 | 0                      |                                  |
|                         | T7>-bla-frag2           | + ∞H <sub>6</sub> < | 800                 | 0                      |                                  |
|                         | T7>-FRB~ bla-frag2      | + ∞H <sub>6</sub> < | 20                  | 0                      | 1                                |
|                         | T7>-ZipE34~ bla-frag2   | + ∞H <sub>6</sub> < | 1500                | 0                      | A and B sequenced                |

Success rate in the final round of assembly reactions. Assembly reactions were performed as described. Both part A and B were in one of three pSB1A\*3F backbones and were assembled into pSB1AC3F or pSB1AK3F. 4 clones each were screened by colony PCR. Assemblies of additional target constructs which are not mentioned in this paper, are given as "other constructs".

<sup>a</sup> part A of assembly reaction, usually containing T7start, a domain, the 10aa linker (~) followed by another domain; <sup>b</sup> part B of assembly reaction, always preSCsite-His6-T7stop (∞H<sub>6</sub> <); (see table 3 for part nicknames). <sup>c</sup> colony forming units after transformation; <sup>d</sup> percent of positive clones (4 clones were screened per assembly); <sup>e</sup> number of previous failures to assemble A and B;

Table S2: Yields of intermediate assembly reactions involving pMA and pSB1AT3F vector backbones.

| part A <sup>a</sup> | + | part B <sup>b</sup> | c.f.u. <sup>c</sup> | % correct <sup>d</sup> | comment                                      |
|---------------------|---|---------------------|---------------------|------------------------|----------------------------------------------|
| FKBP                | + | ~GLuc-frag1         | 140                 | 50                     |                                              |
| FKBP                | + | ~GLuc-frag2         | 40                  | 75                     |                                              |
| FKBP                | + | ~Citrine            | 50                  | 75                     |                                              |
| FKBP                | + | ~Cherry             | 60                  | 50                     |                                              |
| FKBP                | + | ~Cerulean           | n.d.                | 50                     |                                              |
| FKBP                | + | ~blac-frag1         | n.d.                | 25                     |                                              |
| FKBP                | + | ~blac-frag2         | n.d.                | 25                     |                                              |
| FRB                 | + | ~GLuc-frag1         | 180                 | 75                     |                                              |
| FRB                 | + | ~GLuc-frag2         | 140                 | 50                     |                                              |
| FRB                 | + | ~Citrine            | n.d.                | 0                      | later: T7start-FRB + ~Citrine → 100% correct |
| FRB                 | + | ~Cherry             | n.d.                | 25                     |                                              |
| FRB                 | + | ~Cerulean           | n.d.                | 50                     |                                              |
| FRB                 | + | ~blac-frag1         | 51                  | 50                     |                                              |
| FRB                 | + | ~blac-frag2         | n.d.                | 50                     |                                              |

Success rate in an intermediate round of assembly reactions where part A was provided in the pMA vector backbone and part B in the pSB1AT3F vector backbone. Reactions were performed as described. 4 clones each were screened by colony PCR.

<sup>a</sup> part A of assembly reaction (in pMA) <sup>b</sup> part B of assembly reaction, always 10aa linker (~) plus a domain; (see table 3 for part nicknames). <sup>c</sup> colony forming units after transformation (n.d. = not determined); <sup>d</sup> percent of positive clones;

Table S3: Yields of initial assembly reactions involving short parts.

| part A <sup>a</sup>    | + | part B <sup>b</sup>    | c.f.u. <sup>c</sup> | % correct <sup>d</sup> | failures <sup>e</sup> |
|------------------------|---|------------------------|---------------------|------------------------|-----------------------|
| StrepII (pMA)          | + | T7stop (pMA)           | n.d.                | 0                      |                       |
| GST (pMA)              | + | T7stop (pMA)           | n.d.                | 0                      |                       |
| preSC-Strep (pSB1AC3F) | + | T7stop (pMA)           | 2000                | 25                     |                       |
| preSC-GST (pSB1AC3F)   | + | T7stop (pMA)           | n.d.                | 50                     |                       |
| preSC (pMA)            | + | His6 (pMA)             | 180                 | 0                      |                       |
| preSC (pMA)            | + | His6-T7stop (pSB1AT3F) | 24                  | 25                     | 2                     |

Success rate in initial rounds of assembly reactions where part A or B are short (except Gst, T7stop) or provided in pMA backbone. Reactions were performed as described. 4 clones each were screened by colony PCR.

<sup>a</sup> part A of assembly reaction, vector backbone given in brackets <sup>b</sup> part B of assembly reaction, vector backbone given in brackets; (see table 3 for part nicknames) <sup>c</sup> colony forming units after transformation (n.d. = not determined); <sup>d</sup> percent of positive clones; <sup>e</sup> number of previous failures to assemble A and B;

## Sequences of final protein constructs

Note, sequences of basic parts and final constructs are deposited at the Registry of Standard Biological Parts (<http://partsregistry.org>) and are available under the accession numbers given in the main article. We here include the sequences of final protein constructs for reference. The sequences include the (modified, RFC 25) BioBrick prefix (uppercase), followed by the T7 start cassette that also contains the leading ATG, the protein coding sequence with intervening assembly scars (uppercase) and the T7 terminator starting with two STOP codons. Each sequence ends with the RFC 25 BioBrick suffix (uppercase). Note that prefix and suffix sequences do not, technically, belong to the part.

Fasta headers of each sequence provide (1) the lab-internal part ID (on <http://bricket.crg.es>), (2) protein ID used in the article, (3) the MIT part ID (on <http://partsregistry.org>), (4) a short textual description of the part composition.

```
>rg1114 P01 [BBa_J18933] (>FKBPGLucApreHis<)
GAATTCGCGGCCGCTTCTAGATGGCCGGCtaatacgaactcactatagggagaccacaacggtttcctctagcaataatt
ttgtttaactttaagaaggagatatacatatgACCGGCggtgtgcaggtggaaccattagcccgggtgatggccgtacc
ttccgaaacgtggccagacctgctggtgcatataccggcatgctggaagatggcaaaaaattgatagcagccgcga
tcgtaacaaaccggttcaaatcatgctgggcaaacaggaagtgatcgcggtgggaggaaggcgtggcgagatgagcg
ttggccagcgtgcaaaactgacctcagcccggattatgctgatggcgacccggccatccgggtattattccgcgcat
gcgacctggtgtttgatgtggaactgctgaaactggaaACCGGCggtagcggcagcggtagcggtagcggcagcACCGG
Caaaccgaccgaaaacaacgaagattttaacattgtggcggtggcgagcaactttgcgaccaccgatctggatgctggatc
gtggcaaaactgcccgggcaaaaaactgcccgtggaagtgctgaaagaaatggaagcgaacgcgcgtaaaagccggtgacc
cgtggctgctgatattgctgagccatattaaatgacccccgaaaatgaaaaatattatcccgggtcgttgccataccta
tgaaggcgataaagaaagcgcgcagggcgccattggcACCGGCctggaagtgctgtttcagggcccgACCGGCcatcatc
atcatcatcatACCGGCtagtgactgctaacaagccccgaaaggaagctgagttggctgctgccaccgctgagcaataac
tagcataacccttggggcctctaaccgggtcttgaggggttttttggctgaaaggaggaactatataccggatACCGGTTA
ATACTAGTAGCGGCCGCTGCAG
```

```
>rg1115 P02 [BBa_J18934] (>FKBPGLucBpreHis<)
GAATTCGCGGCCGCTTCTAGATGGCCGGCtaatacgaactcactatagggagaccacaacggtttcctctagcaataatt
ttgtttaactttaagaaggagatatacatatgACCGGCggtgtgcaggtggaaccattagcccgggtgatggccgtacc
ttccgaaacgtggccagacctgctggtgcatataccggcatgctggaagatggcaaaaaattgatagcagccgcga
tcgtaacaaaccggttcaaatcatgctgggcaaacaggaagtgatcgcggtgggaggaaggcgtggcgagatgagcg
ttggccagcgtgcaaaactgacctcagcccggattatgctgatggcgacccggccatccgggtattattccgcgcat
gcgacctggtgtttgatgtggaactgctgaaactggaaACCGGCggtagcggcagcggtagcggtagcggcagcACCGG
Cgaagcgatttgggatattccgaaaattccgggctttaaagatctggaaccgatggaacagtttattgcgaggtggatc
tgtcggtggattgcaccaccggctgctgaaaggcctggccaactgagcagtgagcagatctgctgaaaaaatggctgccg
cagcgttgcgcgacctttgcgagcaaaatccagggccaggtggataaaaatgaaaggcgcgggtggcgatACCGGCctgga
agtgtgtttcagggcccgACCGGCcatcatcatcatcatcatcatACCGGCtagtgactgctaacaagccccgaaaggaagc
tgagttggctgctgccaccgctgagcaataactagcataacccttggggcctctaaccgggtcttgaggggttttttgc
tgaaggaggaactatataccggatACCGGTTAATACTAGTAGCGGCCGCTGCAG
```

```
>rg1116 P03 [BBa_J18935] (>FKBPCitrinepreHis<)
GAATTCGCGGCCGCTTCTAGATGGCCGGCtaatacgaactcactatagggagaccacaacggtttcctctagcaataatt
ttgtttaactttaagaaggagatatacatatgACCGGCggtgtgcaggtggaaccattagcccgggtgatggccgtacc
ttccgaaacgtggccagacctgctggtgcatataccggcatgctggaagatggcaaaaaattgatagcagccgcga
tcgtaacaaaccggttcaaatcatgctgggcaaacaggaagtgatcgcggtgggaggaaggcgtggcgagatgagcg
ttggccagcgtgcaaaactgacctcagcccggattatgctgatggcgacccggccatccgggtattattccgcgcat
gcgacctggtgtttgatgtggaactgctgaaactggaaACCGGCggtagcggcagcggtagcggtagcggcagcACCGG
Cgtgagcaaaaggcgaagaactgtttaccggcgtggtgctgattctggtggaactggatggtgatgtgaacggccataaat
ttagcgtgagcggcgaaggcgaaggtgatgagacctatggcaactgacctgaaatttatttgaccacgggtaaaactg
ccggttccgtggccgacctgggtgaccacctttggctatggcctgatgtgctttgcgcttatccggatcatatgaaaca
gcagatttctttaaagcgcctatgcccgaaggctatgtgcaggaacgcaccatctttttaaagatgatggcaactata
aaaccggtgcggaagtgaatttgaaggcgataccctggtgaaccgtattgaaactgaaaggcagcagatttcaagaagat
ggcaacattctgggcatataactggaatataactacaacagccataacgtgtatcatggcggaataaacgaaaaacg
catcaaagtgaactttaaactccgccacaacattgaagatggcagcgtgagcgtggccgatcattatcagcagaacaccc
cgatgggtgatggccggctgctgctgccggataaccattatctgagctaccagagcaaaactgagcaaaagatccgaacgaa
```

aaacgtgatcacatggtgctgctggaatltgtgaccgcagccggtattaccctgggcatggatgaaactgtacaaaACCGG  
CctggaagtgtgtttcagggcccgACCGGCcatcatcatcatcatcatACCGGCtagtgactgctaaacaaagcccgaaa  
ggaagctgagttggctgctgccaccgctgagcaataactagcataacccttggggcctctaaacgggtcttgaggggtt  
tttgctgaaaggaggaactatatccggatACCGGTTAATACTAGTAGCGGCCGCTGCAG

>rg1117 P04 [Bba\_J18936] (>FKBPCherrypreHis<)  
GAATTCGCGGCCGCTTCTAGATGGCCGGCtaatacgcactcactatagggagaccacaacggtttccctctagcaataatt  
ttgtttaactttaagaaggagatatacatatgACCGGCggtgtgcaggtggaaccattagcccggtgatggccgtacc  
ttccgaaacgtggccagacctgctggtgcatataccggcatgctggaagatggcaaaaaattgatagcagccgcga  
tcgtaacaaaccggttcaaatcatgctgggcaaacaggaagtgatcgcggtgggaggaaggcgtggcgagatgagcg  
ttggccagcgtgcaaaactgacctcagcccgattatgctgtagggcgaccggccatccgggtattattccgccgcat  
gcgaccctggtgtttgatgtggaactgctgaaactggaaACCGGCggtagcggcagcggtagcggtagcggcagcACCGG  
Cgtgagcaaaaggcgaggaagataacatggcgatcattaagaatttatgctgtttaaagtgcataatggaaggcagcgtga  
acggccatgaatttgaaatggaaggcgaaggcgaaggtcgccgatgaaggcaccagaccgcaaaactgaaagtgacc  
aaaggcgggtccgctgcccgtttgctgggataattctgagcccgagtttatgtatggcagcaaaagcgtatgtgaaacatcc  
ggcgatattccggtattctgaaactgagctttccggaaggctttaaattggaaacgcgtgatgaactttgaaagtggcg  
gctggtgacctgaccaggatagcagcctgcaagatggcgaatttatctataaagtgaaactgctggcacaacttt  
ccgagcgtggcccggtgatgcagaaaaaacatgggctgggaagcgagcagcgaactgatgatccggaagatggcg  
gctgaaaggcgaaatataacagcgcctgaaactgaaagatggcgccattatgatgcggaagtgaaaccacataaag  
cgaaaaaacagtgagctgcccgggtgctgataacgtgaacatcaactggatatacaccagccacaacgaagattatacc  
atcgtggaacagatgaaactgcccgaaggcctcatagcaccggcgcatggatgaactgtataaaACCGGCctggaagt  
gctgtttcagggcccgACCGGCcatcatcatcatcatcatACCGGCtagtgactgctaaacaaagccgaaaggagctga  
gttgctgctgccaccgctgagcaataactagcataacccttggggcctctaaacgggtcttgaggggtttttgctga  
aaggaggaactatatccggatACCGGTTAATACTAGTAGCGGCCGCTGCAG

>rg1118 P05 [Bba\_J18937] (>FKBPCerulpreHis<)  
GAATTCGCGGCCGCTTCTAGATGGCCGGCtaatacgcactcactatagggagaccacaacggtttccctctagcaataatt  
ttgtttaactttaagaaggagatatacatatgACCGGCggtgtgcaggtggaaccattagcccggtgatggccgtacc  
ttccgaaacgtggccagacctgctggtgcatataccggcatgctggaagatggcaaaaaattgatagcagccgcga  
tcgtaacaaaccggttcaaatcatgctgggcaaacaggaagtgatcgcggtgggaggaaggcgtggcgagatgagcg  
ttggccagcgtgcaaaactgacctcagcccgattatgctgtagggcgaccggccatccgggtattattccgccgcat  
gcgaccctggtgtttgatgtggaactgctgaaactggaaACCGGCggtagcggcagcggtagcggtagcggcagcACCGG  
Cgtgagcaaaaggcgaagaactgtttaccggcgtggtgctgattctggtggaactggatggtgatgtgaaacggccataat  
ttagcgtgagcggcgaaggcgaaggtgatgagacctatggcaactgacctgaaattcatttgaccaccggcgaactg  
ccggttccgtggcagacctgggtaccaccctgacctggggcgtgagtgctttgctgcttatccggatcatatgaaaca  
gcagatttctttaaagcggcatgcccgaaggctatgtgaggaacgcaccatctttttaaagatgatggcaactata  
aaaccctgcccgaagtgaatttgaaaggcgaaccctggtgaaccgtattgaaactgaaaggcagatgatttcaagaagat  
ggcaacattctgggcatataactggaatataactacatcagcgaataacgtgtatatcaccgcggtataaacgaaaaacg  
catcaaacgcaactttaaactccgcccacaacattgaagatggcagcgtgagctggccgatcattatcagcagaacacc  
cgattggtgatggcccggtgctgctgccggataaccattatctgagcaccagagcaaaactgagcaagatccgaacgaa  
aaactgatcacatggtgctgctggaatltgtgaccgcagccggtattaccctgggcatggatgaaactgtacaaaACCGG  
CctggaagtgtgtttcagggcccgACCGGCcatcatcatcatcatcatACCGGCtagtgactgctaaacaaagcccgaaa  
ggaagctgagttggctgctgccaccgctgagcaataactagcataacccttggggcctctaaacgggtcttgaggggtt  
tttgctgaaaggaggaactatatccggatACCGGTTAATACTAGTAGCGGCCGCTGCAG

>rg1119 P06 [Bba\_J18938] (>FKBPLacApreHis<)  
GAATTCGCGGCCGCTTCTAGATGGCCGGCtaatacgcactcactatagggagaccacaacggtttccctctagcaataatt  
ttgtttaactttaagaaggagatatacatatgACCGGCggtgtgcaggtggaaccattagcccggtgatggccgtacc  
ttccgaaacgtggccagacctgctggtgcatataccggcatgctggaagatggcaaaaaattgatagcagccgcga  
tcgtaacaaaccggttcaaatcatgctgggcaaacaggaagtgatcgcggtgggaggaaggcgtggcgagatgagcg  
ttggccagcgtgcaaaactgacctcagcccgattatgctgtagggcgaccggccatccgggtattattccgccgcat  
gcgaccctggtgtttgatgtggaactgctgaaactggaaACCGGCggtagcggcagcggtagcggtagcggcagcACCGG  
Ccaccggaaaccctggccaaagtgaagatgcccgaagatcagctgggtgctgctggtgctatatgaaactggatctga  
acagcggcaaaattctggaatctttcgtccggaagaacggtttccgatgatgagcacctttaaagtgctgctgctgctg  
gctgtctgagccgtattgatgcccaggaacagctgggcccgtgctattcattatagccagaacgatctggtggaata  
tagccgggtgaccgaaaaacatctgaccgatggcatgaccgtgggcgaactgtgagcgcggcgattaccatgagcgata  
acaccgcccgaacctgctgctgaccaccattggcgggtccgaaagaactgaccgctttctgctgaaacatggcgatcat

gtgaccgctctggatcgttgggaaccggaactgaacgaagcgattccgaacgatgaacgtgataccaccaccccggtggc  
catggcgaccaccctgctgaaactgctgaccggcgaactgctgggcACCGGCctggaagtgtgtttcagggcccACCG  
GCcatcatcatcatcatACCGGCtagtgactgctaacaaagcccgaaggaagctgagttggctgctgccaccgctg  
agcaataactagcataacccttggggcctctaaccgggtcttgaggggttttttctgaaaggaggaactatatccgga  
tACCGGTTAATACTAGTAGCGGCCGCTGCAG

>rgl120 P07 [BBa\_J18939] (>FKBPLacBpreHis<)  
GAATTCGCGGCCGCTTCTAGATGGCCGGCtaatacgcactcactatagggagaccacaacggtttccctctagcaataatt  
ttgtttaactttaagaaggagatatacatatgACCGGCcgtgtgcaggtggaaccattagcccgggtgatggccgtacc  
ttccgaaacgtggccagacctgctggtgcattataccggcatgctggaagatggcaaaaatttgatagcagccgca  
tcgtaacaaaccggttcaaatcatgctgggcaaacaggagtgatcgcggctgggaggaaggcgtggcgagatgagcg  
ttggccagcgtgcaaaactgacctagcccggattatgctgtagcgcgaccggccatccgggtattattccgcccgat  
gcgaccctggtgtttgatggtgaaactgctgaaactggaaACCGGCcgttagcggcagcggtagcggtagcggcagcACCGG  
Cggtactccgcttcccggcaacaattaatggactggatgaaagcggataaaagtgcaggaccactctgctgctcggctgc  
ttccggctggctgggtttatgctgataaatctggagccggtagcgtgggtctcgcggatcattgcagcactggggcca  
gatggaagccctcccgtatcgtagtattctacacgacggggagtcaggcaactatggatgaactgaatcgtcagatcgc  
tgagataggtgctcactgattaagcattggACCGGCcctggaagtgtgtttcagggcccACCGGCcatcatcatcatc  
atcatACCGGCtagtgactgctaacaaagcccgaaggaagctgagttggctgctgccaccgctgagcaataactagcat  
aacccttggggcctctaaccgggtcttgaggggttttttctgaaaggaggaactatatccggatACCGGTTAATACTA  
GTAGCGGCCGCTGCAG

>rgl121 P08 [BBa\_J18940] (>FrbGLucApreHis<)  
GAATTCGCGGCCGCTTCTAGATGGCCGGCtaatacgcactcactatagggagaccacaacggtttccctctagcaataatt  
ttgtttaactttaagaaggagatatacatatgACCGGCatcctgtggcatgaaatgtggcatgaaggcctggaagaagcg  
agccgtctgtattttggcgaacgtaacgtgaaaggcatgtttgaagtgtggaaccgctgcatgccatgatggaacgtgg  
cccgcagaccctgaaagaaccagctttaaccaggcgtatggcctgatctgatggaagcgcaggaatggtgcccgtaaat  
acatgaaaagcggcaacgtgaaagatctgctgcaagcgtgggatctgtattatcatgtgtttcgcgcgatcagcaaaACC  
GGCggttagcggcagcggtagcggtagcggcagcACCGGCaaaccgaccgaaaaaacgaagattttaacatgtggcgg  
ggcgagcaactttgcgaccaccgatctggatgcccgtcgtggcaactgcccggcaaaaaactgcccgtggaagtgtga  
aagaaatggaagcgaacgcgctaaagccggttgaccctggctgctgatttgctgagccatataaaatgcaccctg  
aaaatgaaaaatttatcccgggtcgttgccatacctatgaagcgcataaagaagcgcgagggcggcatggcACCGG  
CctggaagtgtgtttcagggcccACCGGCcatcatcatcatcatACCGGCtagtgactgctaacaaagcccgaag  
ggaagctgagttggctgctgccaccgctgagcaataactagcataaacccttggggcctctaaccgggtcttgaggggt  
ttttgctgaaaggaggaactatatccggatACCGGTTAATACTAGTAGCGGCCGCTGCAG

>rgl122 P09 [BBa\_J18941] (>FrbGLucBpreHis<)  
GAATTCGCGGCCGCTTCTAGATGGCCGGCtaatacgcactcactatagggagaccacaacggtttccctctagcaataatt  
ttgtttaactttaagaaggagatatacatatgACCGGCatcctgtggcatgaaatgtggcatgaaggcctggaagaagcg  
agccgtctgtattttggcgaacgtaacgtgaaaggcatgtttgaagtgtggaaccgctgcatgccatgatggaacgtgg  
cccgcagaccctgaaagaaccagctttaaccaggcgtatggcctgatctgatggaagcgcaggaatggtgcccgtaaat  
acatgaaaagcggcaacgtgaaagatctgctgcaagcgtgggatctgtattatcatgtgtttcgcgcgatcagcaaaACC  
GGCggttagcggcagcggtagcggtagcggcagcACCGGCgaagcgtatgtggatattccggaaattccgggctttaaga  
tctggaaccgatggaacagtttattgcgaggtggatctgtgctggattgcaccaccggctgctgaaaggcctggcca  
acgtgcagtgagcagctgctgtaaaaaatggctgcccagcgttgccgacctttgagagcaaaattcagggccaggtg  
gataaaatgaaaggcgggtggcgatACCGGCcctggaagtgtgtttcagggcccACCGGCcatcatcatcatcatca  
tACCGGCtagtgactgctaacaaagcccgaaggaagctgagttggctgctgccaccgctgagcaataactagcataacc  
ccttggggcctctaaccgggtcttgaggggttttttctgaaaggaggaactatatccggatACCGGTTAATACTAGTAG  
CGGCCGCTGCAG

>rgl123 P10 [BBa\_J18942] (>FrbCherrypreHis<)  
GAATTCGCGGCCGCTTCTAGATGGCCGGCtaatacgcactcactatagggagaccacaacggtttccctctagcaataatt  
ttgtttaactttaagaaggagatatacatatgACCGGCatcctgtggcatgaaatgtggcatgaaggcctggaagaagcg  
agccgtctgtattttggcgaacgtaacgtgaaaggcatgtttgaagtgtggaaccgctgcatgccatgatggaacgtgg  
cccgcagaccctgaaagaaccagctttaaccaggcgtatggcctgatctgatggaagcgcaggaatggtgcccgtaaat  
acatgaaaagcggcaacgtgaaagatctgctgcaagcgtgggatctgtattatcatgtgtttcgcgcgatcagcaaaACC  
GGCggttagcggcagcggtagcggtagcggcagcACCGGCgtgagcaaaaggcaggaagataacatggcgatcattaaaga  
attatgctgctttaagtgcataatggaaggcagcgtgaacggccatgaatttgaaatgaaaggcgaaggcgaaggtcctc

cgatgaaggcaccagaccgcaaaactgaaagtgaccaaaaggcggtccgctgcccgtttgctggtgggatattctgagcccg  
cagtttatgtatggcagcaaagcgtatgtgaaacatccggcggtatattccgattatctgaaactgagctttccggaagg  
ctttaaagtggaacgcgtgatgaactttgaagatggcgcggtgaccgtgaccaggatagcagcctgcaagatggcg  
aatttatctataaagtgaaactgcgtggcaccactttccgagcgtatggcccgtgatgcagaaaaaacatgggctgg  
gaagcagcagcgaacgtatgtatccggaagatggcgcgctgaaaggcgaatataaacagcgcctgaaactgaaagatgg  
cggccattatgatgcggaagtgaaaaaccactataaaagcgaaaaaaccagtgacgctgcccgggtgctataacgtgaaca  
tcaactggatatacaccagccacaacgaagattataccatcgtggaacagatgaacgtgcggaaggccgtcatagcacc  
ggcggcatggatgaactgtataaaACCGGCctggaagtgtgtttcagggcccgACCGGCcatcatcatcatcatAC  
CGGctagtactgctaacaagcccgaaggaagctgagttggctgtgccaccgctgagcaataactagcataaccct  
tggggcctctaaacgggtcttgaggggtttttgctgaaaggaggaactatataccggatACCGGTTAATACTAGTAGCGG  
CCGCTGCAG

>rgl125 P11 [BBa\_J18943] (>ZipEGLucApreHis<)  
GAATTCGCGGCCGCTTCTAGATGGCCGGCtaatacgcactcactatagggagaccacaacggtttccctctagcaataatt  
ttgtttaactttaagaaggagatatacatatgACCGGCattaccattcgtgcccgtttctgaaaaagaaaaaccgcg  
ctgctaccgaaattgcggaactgaaaaagaagtgggccgttgcaaaacattgtgagcaatacgaacccttatgg  
cccgtgACCGGCggtagcggcagcggtagcggtagcggcagcACCGGCaaaccgaccgaaaaacaagaattttaaca  
ttgtggcggtggcagcaactttgcgaccaccgatctggatgcggtatcgtggcaaacgcccgggcaaaaaactgcccgtg  
gaagtgtgaaagaaatggaagcgaacgcgcgtaaaagcgggttgaccctggtgctgctgatttgctgagccatattaa  
atgacccccgaaatgaaaaatttatcccgggtcgttgccatacctatgaaggcgataaagaaagcgcgagggcgga  
ttggcACCGGCctggaagtgtgtttcagggcccgACCGGCcatcatcatcatcatACCGGCtagtactgctaaca  
aagcccgaaggaagctgagttggctgtgccaccgctgagcaataactagcataacccttggggcctctaaacgggtc  
ttgaggggtttttgctgaaaggaggaactatataccggatACCGGTTAATACTAGTAGCGGCCGCTGCAG

>rgl126 P12 [BBa\_J18944] (>ZipECerulPreHis<)  
GAATTCGCGGCCGCTTCTAGATGGCCGGCtaatacgcactcactatagggagaccacaacggtttccctctagcaataatt  
ttgtttaactttaagaaggagatatacatatgACCGGCattaccattcgtgcccgtttctgaaaaagaaaaaccgcg  
ctgctaccgaaattgcggaactgaaaaagaagtgggccgttgcaaaacattgtgagcaatacgaacccttatgg  
cccgtgACCGGCggtagcggcagcggtagcggtagcggcagcACCGGCgtgagcaaaaggcgaagaactgtttaccggc  
tggtgccgatctggtggaactggatggtgatgtgaacggccataaatttagcgtgagcggcgaaggcgaaggtgatg  
acctatggcaaacgaccctgaaattcatttgaccaccggcaaacgcccgttccgtggccgaccctggttaccacct  
gacctggggcgtgagtgctttgcccgttatccggatcatatgaaacagcagcatttctttaaagcgcctatgcccgaag  
gctatgtgcaggaacgcaccatctttttaaagatgatggcaactataaaaccctgcccgaagtgaatttgaaaggcgt  
accctggtgaaccgtatgaaactgaaaggcatcgatttcaaagaagatggcaacattctgggccataaaactggaatataa  
ctacatcagcgaataacgtgtatatacccgcgataaaacagaaaaacggcatcaaagcgaactttaaactccgccaaca  
ttgaagatggcagcgtgagcgtggccgatcattatcagcagaacccccgatgggtgatggcccgtgctgctgcccgat  
aaccattatctgagcaccagagcaaaactgagcaaaagatccgaacgaaaaacgtgatcacatggtgctgctggaattt  
gaccgcagccggtattaccctggcgatggatgaactgtacaaaACCGGCctggaagtgtgtttcagggcccgACCGGC  
atcatcatcatcatcatACCGGCtagtactgctaacaagcccgaaggaagctgagttggctgtgccaccgctgagc  
aataactagcataacccttggggcctctaaacgggtcttgaggggtttttgctgaaaggaggaactatataccggatAC  
CGGTTAATACTAGTAGCGGCCGCTGCAG

>rgl128 P13 [BBa\_J18945] (>ZipRGLucBpreHis<)  
GAATTCGCGGCCGCTTCTAGATGGCCGGCtaatacgcactcactatagggagaccacaacggtttccctctagcaataatt  
ttgtttaactttaagaaggagatatacatatgACCGGCctggaatccgtgcccgtttctgaaaaagaaaaaccgcg  
ctgctaccctgcccggaaactgcgtaaacgtgtggccgttgccgtaacattgtgagcaatacgaacccttatgg  
cccgtgACCGGCggtagcggcagcggtagcggtagcggcagcACCGGCgaagcgtattgtggatattccggaattccgg  
gctttaaagatctggaaccgatggaacagtttatgcccaggtggatctgtgctggtatgaccaccggctgctgaa  
ggcctggccaacgtgagcgtgagcgtatctgtgaaaaaatggctgcccagcgttgccgacctttgagcaaaaattca  
gggcccaggtggataaaattaaaggcgggtggcgatACCGGCctggaagtgtgtttcagggcccgACCGGCcatcat  
atcatcatcatcatcatACCGGCtagtactgctaacaagcccgaaggaagctgagttggctgtgccaccgctgagcaata  
tagcataacccttggggcctctaaacgggtcttgaggggtttttgctgaaaggaggaactatataccggatACCGGTTA  
ATACTAGTAGCGGCCGCTGCAG

>rgl130 P14 [BBa\_J18946] (>ZipELacApreHis<)  
GAATTCGCGGCCGCTTCTAGATGGCCGGCtaatacgcactcactatagggagaccacaacggtttccctctagcaataatt  
ttgtttaactttaagaaggagatatacatatgACCGGCattaccattcgtgcccgtttctgaaaaagaaaaaccgcg



ctgctaccgaaattgcggaactggaaaaagaagtgggcccgttgcgaaaacattgtgagcaaatacgaaaccggttatgg  
cccctgACCGGCggttagcggcagcggtagcggcagcACCGGCcaccggaaaccctggccaaagtgaaagatg  
cggaaagatcagctgggtgcgctgtgggtatattgaactggatctgaacagcggcaaaattctggaaatctttcgtccg  
gaagaacggtttccgatgatgagcacctttaaagtgtctgtgctgctgctgagccggtatgatgaggccagga  
acagctgggcccgtcgtattcattatagccagaacgatctggtggaatatagcccggtagccgaaaaacatctgaccgatg  
gcatgaccgtgggcaactgtgacgagcggcgattaccatgagcgataaacaccgaggcaacctgctgctgaccaccatt  
ggcgggtccgaaagaactgaccgctttctgctgaacatggggcatcatgtgaccgctctggatcgttgggaaccggaact  
gaacgaagcgtatccgaacgatgaacgtgataaccaccaccgggtggccatggcgaccaccctgctgaaactgctgaccg  
gcaactgctgggACCGGCctggaagtgtgtttcagggcccACCGGCcatcatcatcatcatcatACCGGCtagtga  
ctgctaacaagcccgaaggaagctgagttggctgctgccaccgctgagcaataactagcataacccttggggcctct  
aaaccgggtcttgaggggttttttctgtaagggaggaactatataccggatACCGGTTAATACTAGTAGCGGCCGCTGCAG

>rgl131 P15 [BBa\_J18947] (>Lov2GLucAprHis<)  
GAATTCGCGGCCGCTTCTAGATGGCCGGCtaatacgaactcactatagggagaccacaacggtttccctctagcaataatt  
ttgtttaactttaagaaggagatatacatatgACCGGCgaaagcgtggatgataaagtgcgtcagaagaaatgcgtaaa  
ggcattgatctggccaccaccctggaacgtatcgaaaaaaacttctggtgattaccgatccgctctgccggataatccgat  
tatttttgcgagcagatagctttctggaactgaccgaatatagccgtgaagaaatctgggcccgaactgcccgttttctgc  
aaggcccgaaaccgatctgaccaccgtgaaaaaaattcgcaacgcgattgataaccagaccgaagtgaccgtgcagctg  
attaactataccaaaagcggcaaaaaattctggaacatctttcatctgcaaccgatgctgctgatacagaaggcgaagtgc  
gtattttattggcgtgacgtggatggcagcaaacatgtggagccggtgctACCGGCggttagcggcagcggtagcggta  
gcccagcACCGGCaaaccgaccgaaacaacgaagattttaacatgtggcgggtggcgagcaactttgaccaccgat  
ctggatgcccgatctggcaactgcccggcaaaaaactgcccgtggaagtgtgaaagaaatggaagcgaacgcgctgaa  
agcccgttgaccgctgctgctgatttgctgagccatataaatgcaccggcaaaatgaaaaatttatcccgggtc  
gttgcacatctatgaaggcgataaagaaagcgcgagggcggcattggcACCGGCctggaagtgtgtttcagggccc  
ACCGGCcatcatcatcatcatcatACCGGCtagtgactgctaacaagcccgaaggaagctgagttggctgctgccacc  
gctgagcaataactagcataacccttggggcctctaaacgggtcttgaggggttttttctgtaagggaggaactatatac  
cggatACCGGTTAATACTAGTAGCGGCCGCTGCAG

>rgl132 P16 [BBa\_J18948] (>Lov2GLucBpreHis<)  
GAATTCGCGGCCGCTTCTAGATGGCCGGCtaatacgaactcactatagggagaccacaacggtttccctctagcaataatt  
ttgtttaactttaagaaggagatatacatatgACCGGCgaaagcgtggatgataaagtgcgtcagaagaaatgcgtaaa  
ggcattgatctggccaccaccctggaacgtatcgaaaaaaacttctggtgattaccgatccgctctgccggataatccgat  
tatttttgcgagcagatagctttctggaactgaccgaatatagccgtgaagaaatctgggcccgaactgcccgttttctgc  
aaggcccgaaaccgatctgaccaccgtgaaaaaaattcgcaacgcgattgataaccagaccgaagtgaccgtgcagctg  
attaactataccaaaagcggcaaaaaattctggaacatctttcatctgcaaccgatgctgctgatacagaaggcgaagtgc  
gtattttattggcgtgacgtggatggcagcaaacatgtggagccggtgctACCGGCggttagcggcagcggtagcggta  
gcccagcACCGGCgaaagcgtggtgatctccggaatccgggctttaagatctggaaccgatggaacagttatt  
gcccaggtggatctgtgctggatgaccaccggctgctgaaaggcctggccaacgtgacgtgacgagatctgctgaa  
aaaatggctgcccagcgttgcgagacctttcgagcaaaatcagggccaggtggataaaaatgaaaggcggggtggcg  
atACCGGCctggaagtgtgtttcagggcccACCGGCcatcatcatcatcatcatACCGGCtagtgactgctaacaag  
cccgaaggaagctgagttggctgctgccaccgctgagcaataactagcataacccttggggcctctaaacgggtcttg  
aggggttttttctgtaagggaggaactatataccggatACCGGTTAATACTAGTAGCGGCCGCTGCAG

>rgl135 P17 [BBa\_J18949] (>GLucALov2preHis<)  
GAATTCGCGGCCGCTTCTAGATGGCCGGCtaatacgaactcactatagggagaccacaacggtttccctctagcaataatt  
ttgtttaactttaagaaggagatatacatatgACCGGCaaaccgaccgaaacaacgaagattttaacatgtggcgggtg  
gagcaactttgaccaccgatctggatgcccgatctggaacactgcccggcaaaaaactgcccgtggaagtgtgaa  
agaaatggaagcgaacgcgctaaagccggttgaccaccgtggctgctgatttgctgagccatataaatgaccccga  
aaatgaaaaatttatcccgggtcgttgccatctatgaaggcgataaagaagcgcgagggcggcattggcACCGGC  
ggtagcggcagcggtagcggtagcggcagcACCGGCgaaagcgtggatgataaagtgcgtcagaagaaatgctgaaag  
cattgatctggccaccaccctggaacgtatcgaaaaaaacttctggtgattaccgatccgctctgccggataatccgata  
tttttgcgagcagatagctttctggaactgaccgaatatagccgtgaagaaatctgggcccgaactgcccgttttctgcaa  
ggcccgaaaccgatctgaccaccgtgaaaaaaattcgcaacgcgattgataaccagaccgaagtgaccgtgcagctgat  
taactataccaaaagcggcaaaaaattctggaacatctttcatctgcaaccgatgctgctgatacagaaggcgaagtgc  
atattttattggcgtgacgtggatggcagcaaacatgtggagccggtgctACCGGCctggaagtgtgtttcagggccc  
ACCGGCcatcatcatcatcatcatACCGGCtagtgactgctaacaagcccgaaggaagctgagttggctgctgccacc  
gctgagcaataactagcataacccttggggcctctaaacgggtcttgaggggttttttctgtaagggaggaactatatac

cggatACCGGTTAATACTAGTAGCGGCCGCTGCAG

>rgl137 P18 [Bba\_J18950] (>CitrineLov2preHis<)

GAATTCGCGGCCGCTTCTAGATGGCCGGCtaatacgaactcactatagggagaccacaacggtttccctctagcaataatt  
ttgtttaactttaagaaggagataacatatgACCGGCgtgagcaaaaggcgaagaactgtttaccggcgtggtgcccatt  
ctggtggaactggatggtgatgtgaacggccataaatttagcgtgagcggcgaaggcgaaggatgacgacctatggcaa  
actgacctgaaatattttgaccacgggtaaacctgcccgttccgtggccgaccctggtgaccacctttggctatggcc  
tgatgtgctttgcgcttatccggatcatatgaaacagcacgatttctttaaagcgccatgcccgaaggctatgtgca  
gaacgcacctatctttttaagatgatggcaactataaaacccgtgcccgaagtgaatttgaaggcgataacctgggtgaa  
ccgtattgaaactgaaaggcatcgatttcaaagaagatggcaacattctgggcatataaactggaatataactacaacagcc  
ataacgtgtatcatgcccggataaacagaaaaacggcatcaaagtgaactttaaactccgccacaacattgaagatggc  
agcgtgacgtggccgatcattatcagcagaacaccccgatgggtgatggcccgggtgctgctgcccggataaccattatct  
gagctaccagagcaaacctgagcaaaagatccgaacgaaaaacgtgatcacatggtgctgctggaatttgtgaccgcagccg  
gtattaccctgggcatggatgaaactgtacaaaACCGGCggtgagcggcagcggtagcggtagcggcagcACCGGCgaaagc  
gtggatgataaagtgcgtcagaaagaaatgcgtaaaaggatgatctggccaccaccctggaacgtatcgaaaaaaactt  
cgtgattaccgatcccgctctgcccggataatccgattatcttgcgagcagatagctttctggaactgaccgaatatagcc  
gtgaagaaatctgggcccgaactgcccgtttctgcaaggcccgaacccgatctgaccaccgtgaaaaaaatctgcaac  
gcgattgataaccagaccgaagtgaacgtgacgtgattaactataccaaaagcggcaaaaaatctggaacatctttca  
tctgcaaccgatgctgatcagaaaggcgaagtgcagatctttatggcgtgagctggatggcagcaaacatgtggagc  
cgggtcgtACCGGCctggaagtgcgtttcaggggcccACCGGCcatcatcatcatcatACCGGCtagtgactgcta  
acaaagcccgaaggagctgagttggctgctgccaccgctgagcaataactagcataacccttggggcctctaaacgg  
gtcttgaggggttttttctgaaaggaggaactatccggatACCGGTTAATACTAGTAGCGGCCGCTGCAG

>rgl147 P19 [Bba\_J18951] (>FrbCitrinePreHis<)

GAATTCGCGGCCGCTTCTAGATGGCCGGCtaatacgaactcactatagggagaccacaacggtttccctctagcaataatt  
ttgtttaactttaagaaggagataacatatgACCGGCatcctgtggcatgaaatgtggcatgaaggcctggaagaagcg  
agccgtctgtatcttggcgaacgtaacgtgaaaggcatgttgaagtgcggaaaccgctgcatgccatgatggaacgtgg  
cccgcagaccctgaaagaaccagctttaaaccaggcgtatggcctgatctgatggaagcgcaggaatggtgccgtaaat  
acatgaaaagcggcaacgtgaaagatctgctgcaagcgtgggatctgtattatcatgtgttccgcccagcaaaaACC  
GGCggtgagcgcagcggtagcggtagcggcagcACCGGCgtgagcaaaaggcgaagaactgtttaccggcgtggtgccc  
tctggtggaactggatggtgatgtgaacggccataaatttagcgtgagcggcgaaggcgaaggatgacgacctatggca  
aacctgacctgaaatattttgaccacgggtaaacctgcccgttccgtggccgaccctggtgaccacctttggctatggc  
ctgatgtgctttgcgcttatccggatcatatgaaacagcacgatttctttaaagcgccatgcccgaaggctatgtgca  
ggaacgcacctatctttttaagatgatggcaactataaaacccgtgcccgaagtgaatttgaaggcgataacctgggtga  
accgtattgaaactgaaaggcatcgatttcaaagaagatggcaacattctgggcatataaactggaatataactacaacagc  
cataacgtgtatcatgcccggataaacagaaaaacggcatcaaagtgaactttaaactccgccacaacattgaagatgg  
cagcgtgacgtggccgatcattatcagcagaacaccccgatgggtgatggcccgggtgctgctgcccggataaccattatc  
tgagctaccagagcaaacctgagcaaaagatccgaacgaaaaacgtgatcacatggtgctgctggaatttgtgaccgcagcc  
ggatattaccctgggcatggatgaaactgtacaaaACCGGCctggaagtgcgtttcaggggcccACCGGCcatcatcatca  
tcatcatACCGGCtagtgactgctaacaaagcccgaaggagctgagttggctgctgccaccgctgagcaataactagc  
ataacccttggggcctctaaacgggtcttgaggggttttttctgaaaggaggaactatccggatACCGGTTAATACT  
TAGTAGCGGCCGCTGCAG

>rgl140 P20 [Bba\_J18952] (>FrbCerulePreHis<)

GAATTCGCGGCCGCTTCTAGATGGCCGGCtaatacgaactcactatagggagaccacaacggtttccctctagcaataatt  
ttgtttaactttaagaaggagataacatatgACCGGCatcctgtggcatgaaatgtggcatgaaggcctggaagaagcg  
agccgtctgtatcttggcgaacgtaacgtgaaaggcatgttgaagtgcggaaaccgctgcatgccatgatggaacgtgg  
cccgcagaccctgaaagaaccagctttaaaccaggcgtatggcctgatctgatggaagcgcaggaatggtgccgtaaat  
acatgaaaagcggcaacgtgaaagatctgctgcaagcgtgggatctgtattatcatgtgttccgcccagcaaaaACC  
GGCggtgagcgcagcggtagcggtagcggcagcACCGGCgtgagcaaaaggcgaagaactgtttaccggcgtggtgccc  
tctggtggaactggatggtgatgtgaacggccataaatttagcgtgagcggcgaaggcgaaggatgacgacctatggca  
aacctgacctgaaatctattttgaccacgggcaaacctgcccgttccgtggccgaccctggttaccacctgacctggggc  
gtgacgtgctttgcgcttatccggatcatatgaaacagcacgatttctttaaagcgccatgcccgaaggctatgtgca  
ggaacgcacctatctttttaagatgatggcaactataaaacccgtgcccgaagtgaatttgaaggcgataacctgggtga  
accgtattgaaactgaaaggcatcgatttcaaagaagatggcaacattctgggcatataaactggaatataactacatcagc  
gataacgtgtatcatcccgataaacagaaaaacggcatcaaagcgaactttaaactccgccacaacattgaagatgg  
cagcgtgacgtggccgatcattatcagcagaacaccccgatgggtgatggcccgggtgctgctgcccggataaccattatc



cagcagaacacccccgattggtgatggcccggtgctgctgccggataaccattatctgagctaccagagcaaaactgagcaa  
agatccgaacgaaaaacgtgatcacatggtgctgctggaatttgtgaccgcagccggtattaccctgggcatggatgaac  
tgtacaaaACCGGCctggaagtgtgtttcagggcccgACCGGCcatcatcatcatcatACCGGCtagtgactgcta  
acaaagcccgaaggaagctgagttggctgctgccaccgctgagcaataactagcataacccttggggcctctaaacgg  
gtcttgaggggttttttctgtaaaggaggaactatatccggatACCGGTTAATACTAGTAGCGGCCGCTGCAG

>rgl134 P24 [BBa\_J18956] (>Lov2CerulpreHis<)  
GAATTCGCGGCCGCTTCTAGATGGCCGGCtaatacgaactcactatagggagaccacaacggtttccctctagcaataatt  
ttgtttaactttaagaaggagataacatatgACCGGCgaaagcgtggatgataaagtgcgtcagaagaaaatgcgtaaa  
ggcattgatctggccaccaccctggaacgtatcgaaaaaacttctgtgattaccgatccgcgtctgccggataatccgat  
tatttttgcgagcgatagctttctggaactgaccgaatatagccgtgaagaaattctgggcccgaactgcccgtttctgc  
aagcccggaaaccgatctgaccaccgtgaaaaaatctgcaacgcgattgataaccagaccgaagtgaccgtgcagctg  
attaactataccaaaagcggcaaaaaattctggaacatctttcatctgcaaccgatgcgtgatcagaaggcgaagtga  
gtattttatggcgtgcagctggatggcagcaaacatgtggagccggtgcgtACCGGCgtagcggcagcggtagcggta  
gcccagcACCGGCgtagcaaaaggcgaagaactgtttaccggcgtggtgcccattctggtggaactggatggtgatgtg  
aacggccataaatttagcgtgagcggcgaaggcgaagtgtgagcaccatggcaactgaccctgaaattcattttgac  
caccggcaaaactgcccgttccgtggccgaccctgggtaccaccctgacctggggcgtgcagtgctttgcccgttatccgg  
atcatatgaaacagcagcatttctttaaagcgcctatgccggaaggctatgtgcaggaacgcaccatctttttaaagat  
gatggcaactataaaaccgctgcccgaagtgaatttgaaggcgtatccctggtgaaccgtattgaaactgaaaggcatcga  
tttcaaagaagatggcaacattctgggccataaaactggaatataactacatcagcgataacgtgtatatacaccgcccga  
aacagaaaaacggcatcaaagcgaactttaaaatccgccacaacattgaagatggcagcgtgcagctggcccgatcattat  
cagcagaacacccccgattggtgatggcccggtgctgctgccggataaccattatctgagcaccagagcaaaactgagcaa  
agatccgaacgaaaaacgtgatcacatggtgctgctggaatttgtgaccgcagccggtattaccctgggcatggatgaac  
tgtacaaaACCGGCctggaagtgtgtttcagggcccgACCGGCcatcatcatcatcatACCGGCtagtgactgcta  
acaaagcccgaaggaagctgagttggctgctgccaccgctgagcaataactagcataacccttggggcctctaaacgg  
gtcttgaggggttttttctgtaaaggaggaactatatccggatACCGGTTAATACTAGTAGCGGCCGCTGCAG

>rgl142 P25 [BBa\_J18957] (>CerulLov2PreHis<)  
GAATTCGCGGCCGCTTCTAGATGGCCGGCtaatacgaactcactatagggagaccacaacggtttccctctagcaataatt  
ttgtttaactttaagaaggagataacatatgACCGGCgtagcaaaaggcgaagaactgtttaccggcgtggtgcccatt  
ctggtggaactggatggtgatgtgaaacggccataaatttagcgtgagcggcgaaggcgaaggatgagcaccatggcaa  
actgaccctgaaattcattttgaccaccggcaaaactgcccgttccgtggccgaccctgggtaccaccctgacctggggcg  
tgcagtgctttgcccgttatccggatcatatgaaacagcagcatttctttaaagcgcctatgccggaaggctatgtgcag  
gaacgcaccatcttttttaaagatgatggcaactataaaaccgctgcccgaagtgaatttgaaggcgtatccctggtgaa  
ccgtattgaaactgaaaggcatcgtttcaaagaagatggcaacattctgggccataaaactggaatataactacatcagcg  
ataacgtgtatatacaccgcccgaataaacagaaaaacggcatcaaagcgaactttaaaatccgccacaacattgaagatggc  
agcgtgcagctggcccgatcattatcagcagaacacccccgattggtgatggcccggtgctgctgccggataaccattatct  
gagcaccagagcaaaactgagcaaaagatccgaacgaaaaacgtgatcacatggtgctgctggaatttgtgaccgcagccg  
gtattaccctgggcatggatgaaactgtacaaaACCGGCgtagcggcagcggtagcggtagcggcagcACCGGCgaaagc  
gtggatgataaagtgcgtcagaagaaaatgcgtaaaaggcattgatctggccaccaccctggaacgtatcgaaaaaaactt  
cgtgattaccgatccgcgtctgccggataatccgattatttttgcgagcgatagctttctggaactgaccgaatatagcc  
gtgaagaaattctgggcccgaactgcccgtttctgcaaggccggaaaccgatctgaccaccgtgaaaaaaattcgcac  
gcgatgataaccagaccgaagtgaccgtgcagctgattactataccaaaagcggcaaaaaattctggaacatctttca  
tctgcaaccgatgcgtgatcagaaggcgaagtgcagattttatggcgtgcagctggatggcagcaaacatgtggagc  
cgggtgcgtACCGGCctggaagtgtgtttcagggcccgACCGGCcatcatcatcatcatACCGGCtagtgactgcta  
acaaagcccgaaggaagctgagttggctgctgccaccgctgagcaataactagcataacccttggggcctctaaacgg  
gtcttgaggggttttttctgtaaaggaggaactatatccggatACCGGTTAATACTAGTAGCGGCCGCTGCAG
